# Supplementary material
Source: ML conference proceedings conference paper supplement (https://openreview.net/forum?id=YPm0fzy_z6R)
Supplement: supplementary_material [file attachment]

# SGDNet

---

This is a PyTorch implementation of **Signed Graph Diffusion Network** (submitted to ICLR 2021). This paper proposes a novel graph neural network that achieves end-to-end node representation learning for link sign prediction in signed social graphs.

## Prerequisites

---

- python 3.6+
- torch 1.5.0
- numpy 1.18.1
- scipy 1.4.1
- scikit\_learn 0.23.1
- tqdm 4.46.1
- fire 0.3.1
- pytorch 1.5.0
- dotmap 1.3.17
- loguru 0.5.0

## Datasets and Pre-trained SGDNet

---

We provide the datasets used in the paper for reproducibility. You can find the datasets at `./data/${DATASET}` folder where the file's name is `data.tsv`.

- `${DATASET}` is one of `BITCOIN_ALPHA`, `BITCOIN_OTC`, `SLASHDOT` and `EPINIONS`.

The file contains the list of signed edges where each line represents a tuple of (src, dst, sign) which is tab-separated. There are four real-world signed social networks:

- `BITCOIN_ALPHA` : signed social network from the Bitcoin Alpha platform [\[link\]](#)
- `BITCOIN_OTC` : signed social network from the Bitcoin OTC platform [\[link\]](#)
- `SLASHDOT` : signed social network from the Slashdot online review site [\[link\]](#)
- `EPINIONS` : signed social network from the Epinions online review site [\[link\]](#)

This repository also contains pre-trained SGDNet models; you can find them in `./pretrained/${DATASET}` folder where the file's name is `model.pt`. The hyperparameters used for training an SGDNet model are saved at `param.json`.

## Simple Demo

---

You can run the demo script by `bash demo.sh`. It trains SGDNet on `BITCOIN_ALPHA` dataset with hyperparameters stored at `./pretrained/Bitcoin_ALPHA/param.json`. This demo saves the trained model at `./output/Bitcoin_ALPHA/model.pt`. Then, it evaluates the trained model in terms of AUC and F1-macro scores.

## Results of Pre-trained SGDNet

We provide pre-trained SGDNet models which are stored at `./pretrained/${DATASET}/model.pt`, respectively. The experimental results with the pre-trained models are as follows:

| Dataset       | AUC    | F1-macro |
|---------------|--------|----------|
| Bitcoin-Alpha | 0.9177 | 0.7456   |
| Bitcoin-OTC   | 0.9227 | 0.8060   |
| Slashdot      | 0.8944 | 0.7792   |
| Epinions      | 0.9397 | 0.8521   |

Note that we conducted the experiments on GTX 1080 Ti (CUDA version 10.1), and the above results were produced with `random-seed=1`.

## Used Hyperparameters

We briefly summarize the hyperparameters used in the above results. The hyperparameters are stored at `./pretrained/${DATASET}/param.json`.

- Hyperparameters of SGDNet
  - `num-layers` (L): number of SGD layers
  - `c`: ratio of local feature injection
  - `num-diff-layers` (K): number of diffusion steps
  - `hid-dim` (d): hidden feature dimension

| Hyperparameter                   | Bitcoin-Alpha | Bitcoin-OTC | Slashdot | Epinions |
|----------------------------------|---------------|-------------|----------|----------|
| <code>num-layers</code> (L)      | 1             | 2           | 2        | 2        |
| <code>c</code>                   | 0.35          | 0.25        | 0.55     | 0.55     |
| <code>num-diff-layers</code> (K) | 10            | 10          | 10       | 10       |
| <code>hid-dim</code> (d)         | 32            | 32          | 32       | 32       |

- Hyperparameters of optimizer
  - optimizer: Adam

- L2 regularizer ( `weight-decay` ,  $\lambda$ ): 1e-3
- `learning-rate` : 0.01
- `epochs` : 100
- Input feature dimension ( `reduction-dimension` ): 128

## How to Reproduce the Above Results with the Pre-trained Models

You can reproduce the results with the following command which evaluates a test dataset using a pre-trained model.

```
python3 -m run_eval --input-home ../pretrained --dataset ${DATASET} --gpu-id ${GPU_ID}
```

- `${DATASET}` is one of `BITCOIN_ALPHA` , `BITCOIN_OTC` , `SLASHDOT` and `EPINIONS` .
- `${GPU_ID}` is `-1` or your gpu id (maybe, non-negative integer) where `-1` indicates it runs on CPU.

The pre-trained models were generated by the following command:

```
python3 -m run_train --output-home ../output --dataset ${DATASET} --gpu-id ${GPU_ID}
```

Note that those scripts automatically find the file `param.json` for the above hyperparameters. To tune the hyperparameters, modify the json file, or use the below commands.

## Detailed Usage

You can train and evaluate your own datasets using `trainer.py` and `evaluator.py` , respectively. To use those scripts properly, move your working directory to `./src` .

## Training

The following command performs the training process of SGDNet on a given dataset. This automatically splits the dataset by `heldout-ratio` , e.g., if it is 0.2, training:test=0.8:0.2. Note that the split data are guaranteed to be the same if the same `random-seed` is given. After the training is completed, it generates two files called `model.pt` and `param.json` at the `${output-home}/${dataset}` folder where `model.pt` contains parameters of the trained model, and `param.json` has hyperparameters used for the model.

```
python3 -m trainer \
  --data-home ../data \
  --output-home ../output \
  --dataset BITCOIN_ALPHA \
  --heldout-ratio 0.2 \
  --random-seed 1 \
```

```

--reduction-dimension 128 \
--reduction-iterations 30 \
--gpu-id 0 \
--c 0.15 \
--weight-decay 1e-3 \
--learning-rate 0.01 \
--num-layers 1 \
--hid-dim 32 \
--num-diff-layers 10 \
--epochs 100

```

| Option                | Description                                      | Default       |
|-----------------------|--------------------------------------------------|---------------|
| data-home             | data directory path                              | ../data       |
| output-home           | output directory path                            | ../output     |
| dataset               | dataset name                                     | BITCOIN_ALPHA |
| heldout-ratio         | heldout ratio between training and test          | 0.2           |
| radnom-seed           | random seed used for dataset split and torch     | 1             |
| use-torch-random-seed | whether torch uses the above random seed         | True          |
| reduction-dimension   | input feature dimension (SVD)                    | 128           |
| reduction-iterations  | number of iterations required by SVD computation | 30            |
| gpu-id                | gpu id                                           | 0             |
| c                     | ratio of local feature injection                 | 0.15          |
| weight-decay          | weight decay (L2 regularizer) for optimizer      | 1e-3          |
| learning-rate         | learning rate for optimizer                      | 0.01          |
| num-layers            | number of SGD layers (L)                         | 1             |
| hid-dim               | hidden feature dimension (d)                     | 32            |
| num-diff-layers       | number of diffusion steps (K)                    | 10            |
| epochs                | target number of epochs                          | 100           |

## Evaluation

This performs the evaluation process of SGDNet, and reports AUC and F1-macro scores on the test dataset. This uses `model.pt` and `param.json`; thus, you need to check if they are properly

generated by `trainer.py` before this evaluation. Note that it uses the same random seed used by `trainer.py` so that the test dataset is valid for this evaluation.

```
python3 -m evaluator \
  --input-home ../output \
  --dataset BITCOIN_ALPHA \
  --gpu-id 0
```

| Option                  | Description                               | Default                    |
|-------------------------|-------------------------------------------|----------------------------|
| <code>input-home</code> | directory where a trained model is stored | <code>../output</code>     |
| <code>dataset</code>    | dataset name                              | <code>BITCOIN_ALPHA</code> |
| <code>gpu-id</code>     | gpu id                                    | <code>0</code>             |
